# Supplementary material for: Flame-retardant, flexible vermiculite–polymer hybrid film
Source: Royal Society of Chemistry journal article supplement (doi:10.1039/c5ra08382f), 2015-01-01
Supplement: c5ra08382f1.pdf [file c5ra08382f1.pdf]

# **Supporting Information**

## **Flame-retardant, Flexible Vermiculite-Polymer Hybrid Film**

**Jun Young Cheong, Jaehwan Ahn, Mintae Seo, and Yoon Sung Nam**

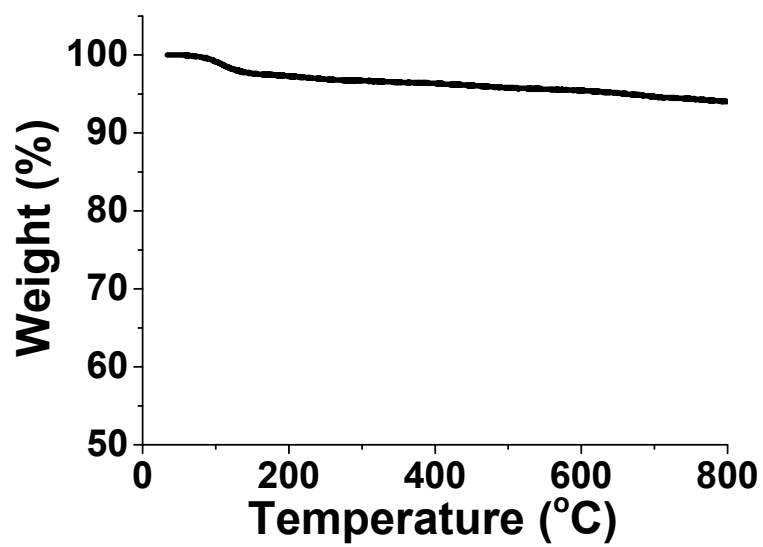

**Fig. S1.** TG curve of pristine vermiculite.

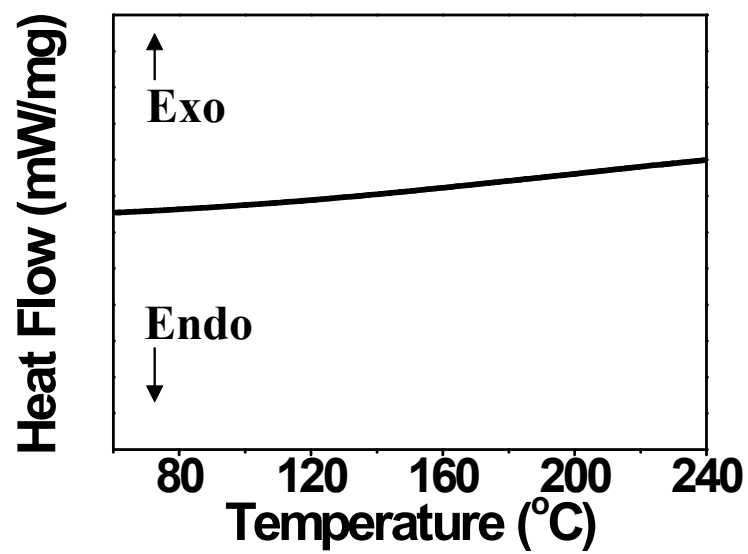

**Fig. S2.** DSC analysis of vermiculite-PEG hybrid film (S3).
